# Supplementary material for: Characterization and Application of Enterocin RM6, a Bacteriocin fromEnterococcus faecalis
Source: Hindawi journal article supplement (doi:10.1155/2013/206917), 2013-01-01
Supplement: f1 [file 206917.f1.pdf]

**Table S1** Detailed MSMS analysis of Enterocin RM6.

| Theoretical m/z                                     | Measured m/z                  | $\Delta$ Mass (Da)   | Internal Ion Sequence                     |
|-----------------------------------------------------|-------------------------------|----------------------|-------------------------------------------|
| <b>Cyclized peptide broken in between I8 and P9</b> |                               |                      |                                           |
| 410.2398                                            | 410.24                        |                      | PAAVA                                     |
| 467.2613                                            | 467.26                        | 57.02 (Gly)          | PAAVAG                                    |
| 568.3089                                            | 568.31                        | 101.05 (Thr)         | PAAVAGT                                   |
| 667.3774                                            | 667.38                        | 99.07 (Val)          | PAAVAGTV                                  |
| 780.4614                                            | 780.461                       | 113.08 (Leu)         | PAAVAGTVL                                 |
| 894.5043                                            | 894.501                       | 114.04 (Asn)         | PAAVAGTVLN                                |
| 993.5728/497.2903 <sup>2+</sup>                     | 993.571/497.29 <sup>2+</sup>  | 99.07 (Val)          | PAAVAGTVLNV                               |
| 1092.6412/546.8245 <sup>2+</sup>                    | 1092.64/546.82 <sup>2+</sup>  | 99.07 (Val)          | PAAVAGTVLNVV                              |
| 1221.6838/611.3458 <sup>2+</sup>                    | 1221.68/611.34 <sup>2+</sup>  | 129.04 (Glu)         | PAAVAGTVLNVVE                             |
| 1292.7209/646.8644 <sup>2+</sup>                    | 1292.72/646.86 <sup>2+</sup>  | 71.04 (Ala)          | PAAVAGTVLNVVEAG                           |
| 1406.7638/703.8858 <sup>2+</sup>                    | 1406.76/703.88 <sup>2+</sup>  | 114.04 (Gly-Gly)     | PAAVAGTVLNVVEAGG                          |
| 1592.8431/796.9255 <sup>2+</sup>                    | 1592.84/796.92 <sup>2+</sup>  | 186.08 (Trp)         | PAAVAGTVLNVVEAGGW                         |
| 1691.9115/846.4597 <sup>2+</sup>                    | 1691.91/846.46 <sup>2+</sup>  | 99.07 (Val)          | PAAVAGTVLNVVEAGGWV                        |
| 896.9835 <sup>2+</sup>                              | 896.98 <sup>2+</sup>          | 101.04 (Thr)         | PAAVAGTVLNVVEAGGWVT                       |
| 1053.5840 <sup>2+</sup>                             | 1053.59 <sup>2+</sup>         | 313.22 (Thr-Ile-Val) | PAAVAGTVLNVVEAGGWVTTIV                    |
|                                                     |                               |                      |                                           |
| 575.3188                                            | 575.32                        |                      | KEFGI                                     |
| 646.3559                                            | 646.36                        | 71.04 (Ala)          | AKEFGI                                    |
| 777.3964                                            | 777.40                        | 131.04 (Met)         | MAKEFGI                                   |
| 963.4757                                            | 963.48                        | 186.08 (Trp)         | WMAKEFGI                                  |
| 1034.5128                                           | 1034.51                       | 71.03 (Ala)          | AWMAKEFGI                                 |
| 958.0586 <sup>+2</sup>                              | 958.05 <sup>+2</sup>          |                      | KKGKRAVIAWMAKEFGI                         |
| 1143.1694 <sup>+2</sup>                             | 1143.17 <sup>+2</sup>         | 370.24 (Lys-Leu-Glu) | EIKKKKGKRAVIAWMAKEFGI                     |
| 1207.2169 <sup>+2</sup>                             | 1207.22 <sup>+2</sup>         | 128.10 (Lys)         | KEIKKKKGKRAVIAWMAKEFGI                    |
| 1271.2643 <sup>+2</sup>                             | 1271.24 <sup>+2</sup>         | 128.04 (Lys)         | KKEIKKKKGKRAVIAWMAKEFGI                   |
| 1327.8064 <sup>+2</sup>                             | 1327.78 <sup>+2</sup>         | 113.08 (Leu)         | LKKEIKKKKGKRAVIAWMAKEFGI                  |
| 1362.4694 <sup>+3</sup>                             | 1362.47 <sup>+3</sup>         |                      | SLLAAAGRESIKAYLKKEIKKKKGKRAVIAWMAKEFGI    |
| 1400.1641 <sup>+3</sup>                             | 1400.16 <sup>+3</sup>         | 113.07 (Leu)         | LSLLAAAGRESIKAYLKKEIKKKKGKRAVIAWMAKEFGI   |
| 1419.1712 <sup>+3</sup>                             | 1419.17 <sup>+3</sup>         | 57.03 (Gly)          | GLSLLAAAGRESIKAYLKKEIKKKKGKRAVIAWMAKEFGI  |
| 1438.1784 <sup>+3</sup>                             | 1438.18 <sup>+3</sup>         | 57.03 (Gly)          | GGLSLLAAAGRESIKAYLKKEIKKKKGKRAVIAWMAKEFGI |
| 1467.1891 <sup>+3</sup> /1100.643                   | 1467.19 <sup>+3</sup> /1100.6 | 87.03 (Ser)          | SGLSLLAAAGRESIKAYLKKEIKKKKGKRAVIAWMAKEFGI |

|                                                       |                                                  |                     |                                                                      |
|-------------------------------------------------------|--------------------------------------------------|---------------------|----------------------------------------------------------------------|
| 6 <sup>+4</sup>                                       | 4 <sup>+4</sup>                                  |                     |                                                                      |
| 1486.1962 <sup>+3</sup> /1114.899<br>0 <sup>+4</sup>  | 1486.19 <sup>+3</sup> /1114.9<br>0 <sup>+4</sup> | 57.00 (Gly)         | GSGGLSLLAAAGRESIKAYLKKEIKKKGKRAVIAMAKEFGI                            |
| 1519.2190 <sup>+3</sup> /1139.666<br>1 <sup>+4</sup>  | 1519.22 <sup>+3</sup> /1139.6<br>4 <sup>+4</sup> | 99.09 (Val)         | VGSGGLSLLAAAGRESIKAYLKKEIKKKGKRAVIAMAKEFGI                           |
| 1542.8981 <sup>+3</sup> /1157.425<br>4 <sup>+4</sup>  | 1542.90 <sup>+3</sup> /1157.4<br>2 <sup>+4</sup> | 71.04 (Ala)         | AVGSGGLSLLAAAGRESIKAYLKKEIKKKGKRAVIAMAKEFGI                          |
| 1576.5806 <sup>+3</sup>                               | 1576.58 <sup>+3</sup>                            | 101.04 (Thr)        | TAVGSGGLSLLAAAGRESIKAYLKKEIKKKGKRAVIAMAKEFGI                         |
| 1614.2753 <sup>+3</sup> /1210.958<br>3 <sup>+4</sup>  | 1614.28 <sup>+3</sup> /1210.9<br>6 <sup>+4</sup> | 113.1 (Leu)         | LTAVGSGGLSLLAAAGRESIKAYLKKEIKKKGKRAVIAMAKEFGI                        |
| 1651.9700 <sup>+3</sup> /1239.229<br>3 <sup>+4</sup>  | 1651.96 <sup>+3</sup> /1239.2<br>3 <sup>+4</sup> | 113.04 (Ile)        | ILTAVGSGGLSLLAAAGRESIKAYLKKEIKKKGKRAVIAMAKEFGI                       |
| 1680.9807 <sup>+3</sup> /1260.987<br>3 <sup>+4</sup>  | 1680.98 <sup>+3</sup> /1260.9<br>9 <sup>+4</sup> | 87.06 (Ser)         | SILTAVGSGGLSLLAAAGRESIKAYLKKEIKKKGKRAVIAMAKEFGI                      |
| 1714.0035 <sup>+3</sup> /1285.754<br>4 <sup>+4</sup>  | 1714.00 <sup>+3</sup> /1285.7<br>5 <sup>+4</sup> | 99.06 (Val)         | VSILTAVGSGGLSLLAAAGRESIKAYLKKEIKKKGKRAVIAMAKEFGI                     |
| 1751.6982 <sup>+3</sup> /1314.025<br>4 <sup>+4</sup>  | 1751.69 <sup>+3</sup> /1314.0<br>2 <sup>+4</sup> | 113.07 (Leu)        | IVSILTAVGSGGLSLLAAAGRESIKAYLKKEIKKKGKRAVIAMAKEFGI                    |
| 1785.3807 <sup>+3</sup> /1339.287<br>4 <sup>+4</sup>  | 1785.38 <sup>+3</sup> /1339.28<br>+4             | 101.07 (Thr)        | TIVSILTAVGSGGLSLLAAAGRESIKAYLKKEIKKKGKRAVIAMAKEFGI                   |
| 1819.0633 <sup>+3</sup> /1364.549<br>3 <sup>+4</sup>  | 1819.06 <sup>+3</sup> /1364.5<br>5 <sup>+4</sup> | 101.04 (Thr)        | TTIVSILTAVGSGGLSLLAAAGRESIKAYLKKEIKKKGKRAVIAMAKEFGI                  |
| 1852.0861 <sup>+3</sup> /1389.316<br>4 <sup>+4</sup>  | 1852.05 <sup>+3</sup> /1389.3<br>1 <sup>+4</sup> | 98.97 (Val)         | VTTIVSILTAVGSGGLSLLAAAGRESIKAYLKKEIKKKGKRAVIAMAKEFGI                 |
| 1435.8362 <sup>+4</sup>                               | 1435.83 <sup>+4</sup>                            | 186.17 (Trp)        | WVTTIVSILTAVGSGGLSLLAAAGRESIKAYLKKEIKKKGKRAVIAMAKEFGI                |
| 1450.0916 <sup>+4</sup>                               | 1450.10 <sup>+4</sup>                            | 57.08 (Gly)         | GWVTTIVSILTAVGSGGLSLLAAAGRESIKAYLKKEIKKKGKRAVIAMAKEFGI               |
| 1464.3469 <sup>+4</sup>                               | 1464.35 <sup>+4</sup>                            | 57.00 (Gly)         | GGWVTTIVSILTAVGSGGLSLLAAAGRESIKAYLKKEIKKKGKRAVIAMAKEFGI              |
| 1514.3669 <sup>+4</sup>                               | 1514.37 <sup>+4</sup>                            | 200.08<br>(Ala+Glu) | EAGGWVTTIVSILTAVGSGGLSLLAAAGRESIKAYLKKEIKKKGKRAVIAMAKEFGI            |
| 1396.4038 <sup>+5</sup>                               | 1396.40 <sup>+5</sup>                            |                     | AVAGTVLNVVEAGGWVTTIVSILTAVGSGGLSLLAAAGRESIKAYLKKEIKKKGKRAVIAMAKEFGI  |
| 1410.6112 <sup>+5</sup>                               | 1410.61 <sup>+5</sup>                            | 71.05 (Ala)         | AAVAGTVLNVVEAGGWVTTIVSILTAVGSGGLSLLAAAGRESIKAYLKKEIKKKGKRAVIAMAKEFGI |
| <b>Cyclized peptide broken in between A11 and V12</b> |                                                  |                     |                                                                      |
| 1124.4120 <sup>+4</sup>                               | 1124.41 <sup>+4</sup>                            |                     | GLSLLAAAGRESIKAYLKKEIKKKGKRAVIAMAKEFGIPAA                            |
| 1138.6674 <sup>+4</sup>                               | 1138.67 <sup>+4</sup>                            | 57.04 (Gly)         | GGLSLLAAAGRESIKAYLKKEIKKKGKRAVIAMAKEFGIPAA                           |
| 1160.4254 <sup>+4</sup>                               | 1160.43 <sup>+4</sup>                            | 87.04 (Ser)         | SGLSLLAAAGRESIKAYLKKEIKKKGKRAVIAMAKEFGIPAA                           |
| 1174.6807 <sup>+4</sup>                               | 1174.68 <sup>+4</sup>                            | 57.00 (Gly)         | GSGGLSLLAAAGRESIKAYLKKEIKKKGKRAVIAMAKEFGIPAA                         |
| 1199.4478 <sup>+4</sup>                               | 1199.44 <sup>+4</sup>                            | 99.04 (Val)         | VGSGGLSLLAAAGRESIKAYLKKEIKKKGKRAVIAMAKEFGIPAA                        |

|                                                       |                                              |                  |                                                         |
|-------------------------------------------------------|----------------------------------------------|------------------|---------------------------------------------------------|
| 1217.2071 <sup>+4</sup>                               | 1217.21 <sup>+4</sup>                        | 71.08 (Ala)      | AVGSGGSLSLAAAGRESIKAYLKKEIKKKGKRAVIAMAKEFGIPAA          |
| 1270.7401 <sup>+4</sup>                               | 1270.74 <sup>+4</sup>                        | 214.12 (Thr-Leu) | LTAVGSGGSLSLAAAGRESIKAYLKKEIKKKGKRAVIAMAKEFGIPAA        |
| 1299.0111 <sup>+4</sup>                               | 1299.01 <sup>+4</sup>                        | 113.08 (Ile)     | ILTAVGSGGSLSLAAAGRESIKAYLKKEIKKKGKRAVIAMAKEFGIPAA       |
| 1320.7691 <sup>+4</sup>                               | 1320.77 <sup>+4</sup>                        | 87.04 (Ser)      | SILTAVGSGGSLSLAAAGRESIKAYLKKEIKKKGKRAVIAMAKEFGIPAA      |
| 1345.5362 <sup>+4</sup>                               | 1345.53 <sup>+4</sup>                        | 99.04 (Val)      | VSILTAVGSGGSLSLAAAGRESIKAYLKKEIKKKGKRAVIAMAKEFGIPAA     |
| 1373.8072 <sup>+4</sup>                               | 1373.80 <sup>+4</sup>                        | 113.08 (Leu)     | IVSILTAVGSGGSLSLAAAGRESIKAYLKKEIKKKGKRAVIAMAKEFGIPAA    |
| 1399.0691 <sup>+4</sup>                               | 1399.07 <sup>+4</sup>                        | 101.08 (Thr)     | TIVSILTAVGSGGSLSLAAAGRESIKAYLKKEIKKKGKRAVIAMAKEFGIPAA   |
| 1424.3310 <sup>+4</sup>                               | 1424.33 <sup>+4</sup>                        | 101.04 (Thr)     | TTIVSILTAVGSGGSLSLAAAGRESIKAYLKKEIKKKGKRAVIAMAKEFGIPAA  |
| 1449.0981 <sup>+4</sup>                               | 1449.10 <sup>+4</sup>                        | 99.08 (Val)      | VTTIVSILTAVGSGGSLSLAAAGRESIKAYLKKEIKKKGKRAVIAMAKEFGIPAA |
| <b>Cyclized peptide broken in between V19 and V20</b> |                                              |                  |                                                         |
| 1327.0270 <sup>+4</sup>                               | 1327.02 <sup>+4</sup>                        |                  | GGLSLLAAAGRESIKAYLKKEIKKKGKRAVIAMAKEFGIPAAVAGTVLNV      |
| 1348.7850 <sup>+4</sup>                               | 1348.78 <sup>+4</sup>                        | 87.04 (Ser)      | SGGSLSLAAAGRESIKAYLKKEIKKKGKRAVIAMAKEFGIPAAVAGTVLNV     |
| 1363.0404 <sup>+4</sup>                               | 1363.04 <sup>+4</sup>                        | 57.04 (Gly)      | GSGGSLSLAAAGRESIKAYLKKEIKKKGKRAVIAMAKEFGIPAAVAGTVLNV    |
| 1387.8075 <sup>+4</sup>                               | 1387.80 <sup>+4</sup>                        | 99.04 (Val)      | VGGGSLSLAAAGRESIKAYLKKEIKKKGKRAVIAMAKEFGIPAAVAGTVLNV    |
| 1405.5667 <sup>+4</sup>                               | 1405.56 <sup>+4</sup>                        | 71.04 (Ala)      | AVGSGGSLSLAAAGRESIKAYLKKEIKKKGKRAVIAMAKEFGIPAAVAGTVLNV  |
| 1430.8287 <sup>+4</sup>                               | 1430.82 <sup>+4</sup>                        | 101.04 (Thr)     | TAVGSGGSLSLAAAGRESIKAYLKKEIKKKGKRAVIAMAKEFGIPAAVAGTVLNV |
| <b>Cyclized peptide broken in between V12 and A13</b> |                                              |                  |                                                         |
| 556.3089                                              | 556.31                                       |                  | AGTVLN                                                  |
| 655.3774                                              | 655.38                                       | 99.07 (Val)      | AGTVLNV                                                 |
| 754.4458                                              | 754.45                                       | 99.07 (Val)      | AGTVLNVV                                                |
| 883.4884                                              | 883.49                                       | 129.04 (Glu)     | AGTVLNVVE                                               |
| 954.5255                                              | 954.53                                       | 71.04 (Ala)      | AGTVLNVVEA                                              |
| 1011.5469                                             | 1011.55                                      | 57.02 (Gly)      | AGTVLNVVEAG                                             |
|                                                       |                                              |                  |                                                         |
| 1106.6527 <sup>+4</sup>                               | 1106.65 <sup>+4</sup>                        |                  | SLAAAGRESIKAYLKKEIKKKGKRAVIAMAKEFGIPAAV                 |
| 1134.9237 <sup>+4</sup>                               | 1134.91 <sup>+4</sup>                        | 113.04 (Ala)     | LSLLAAAGRESIKAYLKKEIKKKGKRAVIAMAKEFGIPAAV               |
| 1531.9030 <sup>+3</sup>                               | 1531.89 <sup>+3</sup>                        | 57.03 (Gly)      | GLSLLAAAGRESIKAYLKKEIKKKGKRAVIAMAKEFGIPAAV              |
| 1163.4345 <sup>+4</sup> /1550.9102 <sup>+3</sup>      | 1163.43 <sup>+4</sup> /1550.91 <sup>+3</sup> | 57.05 (Gly)      | GGLSLLAAAGRESIKAYLKKEIKKKGKRAVIAMAKEFGIPAAV             |
| 1199.4478 <sup>+4</sup> /1598.9280 <sup>+3</sup>      | 1199.45 <sup>+4</sup> /1598.93 <sup>+3</sup> | 144.08 (Ser-Gly) | GSGGSLSLAAAGRESIKAYLKKEIKKKGKRAVIAMAKEFGIPAAV           |
| 1224.2149 <sup>+4</sup> /1631.9508 <sup>+3</sup>      | 1224.22 <sup>+4</sup> /1631.95 <sup>+3</sup> | 99.08 (Val)      | VGGGSLSLAAAGRESIKAYLKKEIKKKGKRAVIAMAKEFGIPAAV           |
| 1241.9742 <sup>+4</sup> /1655.6299 <sup>+3</sup>      | 1241.97 <sup>+4</sup> /1655.63 <sup>+3</sup> | 71.00 (Ala)      | AVGSGGSLSLAAAGRESIKAYLKKEIKKKGKRAVIAMAKEFGIPAAV         |
| 1267.2361 <sup>+4</sup> /1689.3124 <sup>+3</sup>      | 1267.24 <sup>+4</sup> /1689.31 <sup>+3</sup> | 101.08 (Thr)     | TAVGSGGSLSLAAAGRESIKAYLKKEIKKKGKRAVIAMAKEFGIPAAV        |
| 1295.5072 <sup>+4</sup> /1727.007                     | 1295.50 <sup>+4</sup> /1727.0                | 113.04 (Leu)     | LTAVGSGGSLSLAAAGRESIKAYLKKEIKKKGKRAVIAMAKEFGIPAAV       |

|                                                      |                                                  |                      |                                                              |
|------------------------------------------------------|--------------------------------------------------|----------------------|--------------------------------------------------------------|
| 1 <sup>+3</sup>                                      | 1 <sup>+3</sup>                                  |                      |                                                              |
| 1323.7782 <sup>+4</sup>                              | 1323.77 <sup>+4</sup>                            | 113.08 (Ile)         | ILTAVGSGGLSLLAAAGRESIKAYLKKEIKKKKGKRAVIAWMAKEFGIPAAV         |
| 1345.5362 <sup>+4</sup> /1793.712<br>5 <sup>+3</sup> | 1345.53 <sup>+4</sup> /1793.7<br>0 <sup>+3</sup> | 87.04 (Ser)          | SILTAVGSGGLSLLAAAGRESIKAYLKKEIKKKKGKRAVIAWMAKEFGIPAAV        |
| 1370.3033 <sup>+4</sup>                              | 1370.30 <sup>+4</sup>                            | 99.08 (Val)          | VSILTAVGSGGLSLLAAAGRESIKAYLKKEIKKKKGKRAVIAWMAKEFGIPAAV       |
| 1398.5743 <sup>+4</sup>                              | 1398.56 <sup>+4</sup>                            | 113.04 (Ile)         | IVSILTAVGSGGLSLLAAAGRESIKAYLKKEIKKKKGKRAVIAWMAKEFGIPAAV      |
| 1423.8362 <sup>+4</sup>                              | 1423.83 <sup>+4</sup>                            | 101.08 (Thr)         | TIVSILTAVGSGGLSLLAAAGRESIKAYLKKEIKKKKGKRAVIAWMAKEFGIPAAV     |
| 1449.0981 <sup>+4</sup>                              | 1449.10 <sup>+4</sup>                            | 101.08 (Thr)         | TTIVSILTAVGSGGLSLLAAAGRESIKAYLKKEIKKKKGKRAVIAWMAKEFGIPAAV    |
| 1473.8652 <sup>+4</sup>                              | 1473.86 <sup>+4</sup>                            | 99.04 (Val)          | VTTIVSILTAVGSGGLSLLAAAGRESIKAYLKKEIKKKKGKRAVIAWMAKEFGIPAAV   |
| 1534.6404 <sup>+4</sup>                              | 1534.64 <sup>+4</sup>                            | 243.12 (Trp-<br>Gly) | GWVTTIVSILTAVGSGGLSLLAAAGRESIKAYLKKEIKKKKGKRAVIAWMAKEFGIPAAV |
